# Supplementary material for: Synthesis of zwitterionic chimeric polymersomes for efficient protein loading and intracellular delivery
Source: Royal Society of Chemistry journal article supplement (doi:10.1039/d1py00815c), 2021-01-01
Supplement: d1py00815c1.pdf [file d1py00815c1.pdf]

*Supporting Information*

**Synthesis of Zwitterionic Chimeric Polymersomes for Efficient Protein Loading and Intracellular Delivery**

Bingbing Zhao <sup>a</sup>, Yuting Yan <sup>a</sup>, Junmei Zhang <sup>a</sup>, Enping Chen <sup>a</sup>, Ke Wang <sup>a</sup>, Changshun Zhao <sup>a</sup>, Yinan Zhong <sup>a</sup>, Dechun Huang <sup>a</sup>, Zhiqin Cui <sup>a,\*</sup>, Dawei Deng <sup>b</sup>, Congying Gu <sup>c,\*</sup>, and Wei Chen <sup>a,\*</sup>

<sup>a</sup> Department of Pharmaceutical Engineering, School of Engineering, China Pharmaceutical University, 639 Longmian Road, Nanjing 211198, China.

<sup>b</sup> Department of Biomedical Engineering, School of Engineering, China Pharmaceutical University, 639 Longmian Road, Nanjing 211198, China.

<sup>c</sup> School of Science, China Pharmaceutical University, 639 Longmian Road, Nanjing 211198, China.

\*Corresponding authors, emails: [zhiqin.cui@163.com](mailto:zhiqin.cui@163.com) (Z.Q.C.); [1020031086@cpu.edu.cn](mailto:1020031086@cpu.edu.cn) (C.Y.G.); [w.chen@cpu.edu.cn](mailto:w.chen@cpu.edu.cn) (W.C.).

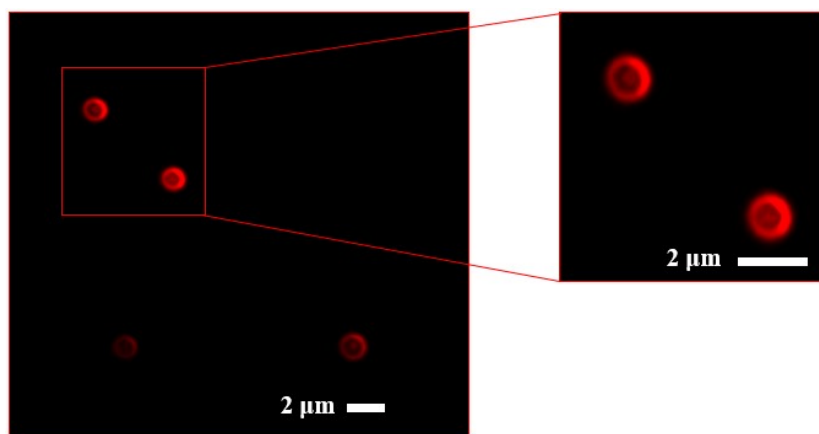

**Fig. S1** Fluorescence images of ZPS polymersomes loaded with Nile red in the hydrophobic membrane layer observed by CLSM.

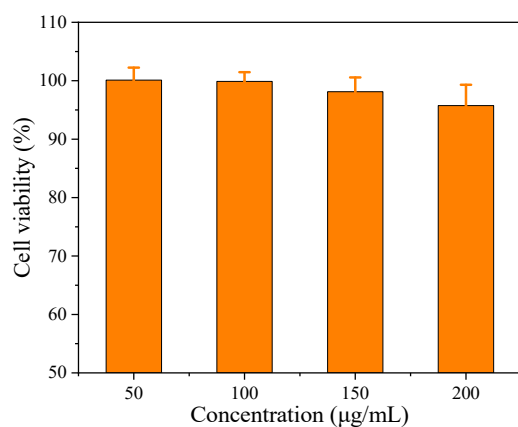

**Fig. S2** MTT assay of blank ZPS in normal human hepatocytes of LO2 cells for 24 h incubation (Data are presented as average  $\pm$  standard deviation).
